# Supplementary material
Source: PubMed Central journal article supplement (PMC4788088)
Supplement: wenf806596.ww1_default.pdf [file wenf806596.ww1_default.pdf]

## Appendix 1: Supplementary tables [posted as supplied by author]

**Table A.** Table showing the primary haplotypes representing the totality of variation in the CRP gene in European descent populations.

|                          | <b>rs3093077</b> | rs3093068 | <b>rs1205</b> | <b>rs1130864</b> | <b>rs1800947</b> | rs1417938 | rs3091244 | rs2794521 | <b>Frequency</b> |
|--------------------------|------------------|-----------|---------------|------------------|------------------|-----------|-----------|-----------|------------------|
| <b>Haplotype 1</b>       | <b>T</b>         | C         | <b>C</b>      | <b>T</b>         | <b>G</b>         | A         | T         | T         | 0.30             |
| <b>Haplotype 2</b>       | <b>T</b>         | C         | <b>C</b>      | <b>C</b>         | <b>G</b>         | T         | C         | C         | 0.24             |
| <b>Haplotype 3</b>       | <b>G</b>         | G         | <b>C</b>      | <b>C</b>         | <b>G</b>         | T         | A         | T         | 0.05             |
| <b>Haplotype 4</b>       | <b>T</b>         | C         | <b>T</b>      | <b>C</b>         | <b>G</b>         | T         | C         | T         | 0.13             |
| <b>Haplotype 5</b>       | <b>T</b>         | C         | <b>T</b>      | <b>C</b>         | <b>C</b>         | T         | C         | T         | 0.03             |
| Haplotype 6 <sup>§</sup> | ?                | ?         | <b>C</b>      | <b>C</b>         | <b>G</b>         | T         | ?         | ?         | 0.07             |
| Haplotype 7 <sup>‡</sup> | <b>T</b>         | C         | <b>T</b>      | <b>C</b>         | ?                | T         | C         | T         | 0.18             |

These haplotypes explain 98% of the variability in the CRP gene in European descent populations. The four pre-specified tagging SNPs are in bold and the remaining SNPs were used as surrogate markers in 100% linkage disequilibrium with the primary SNPs. Haplotypes were identified using 40 SNPs from 39 studies in the CCGC who provided individual participant data on at least two SNPs, supplemented by information from SeattleSNPs (NHLBI Program for Genomic Applications, SeattleSNPs, Seattle, WA. <http://pga.gs.washington.edu> [last accessed Nov, 2009]) and The International HapMap Consortium (*Nature* 2007;449:851-861). § Haplotype 6 comprises participants who cannot be allocated to haplotypes 2 or 3 due to insufficient data on the following SNPs: rs3093077, rs3093068, rs3091244 and rs2794521. ‡ Haplotype 7 comprises participants who cannot be allocated to haplotypes 4 or 5 due to insufficient data on rs1800947.

**Table B.** Descriptive summary by study for 47 studies in the CRP CHD Genetics Collaboration.

| Study / design                                   | Location    | Population source    | Years of baseline survey | Total subjects | Duration of follow up mean (SD) | No. SNPs | Age (years) mean (SD) | No. (%) Male | Incident cases <sup>‡</sup> | Prevalent cases <sup>‡</sup> |
|--------------------------------------------------|-------------|----------------------|--------------------------|----------------|---------------------------------|----------|-----------------------|--------------|-----------------------------|------------------------------|
| <b>Prospective Studies: Case-cohort</b>          |             |                      |                          |                |                                 |          |                       |              |                             |                              |
| ARIC                                             | USA         | Household listings   | 1987-89                  | 14246          | 13.1 (3.2)                      | 2        | 55 (5.8)              | 6419 (45)    | 1118                        | 0                            |
| MONICA/KORA                                      | Germany     | Population register  | 1984-1995                | 1688           | 10.5 (4.8)                      | 10       | 53 (10.3)             | 971 (58)     | 275                         | 0                            |
| <b>Cohort</b>                                    |             |                      |                          |                |                                 |          |                       |              |                             |                              |
| AGES*                                            | Iceland     | Population register  | 1967-1994; 2002-         | 3207           | –                               | 20       | 76 (6)                | 1366 (42)    | 0                           | 793                          |
| BRHS                                             | UK          | GP lists             | 1978-80                  | 3943           | 25.3 (4.5)                      | 4        | 49 (5.5)              | 3943 (100)   | 496                         | 70                           |
| BWHHS <sup>1</sup>                               | UK          | Population register  | 1999-2001                | 3786           | 4.2 (0.8)                       | 4        | 69 (5.5)              | 0 (0)        | 52                          | 262                          |
| CCHS <sup>2</sup>                                | Denmark     | Population register  | 1991-94                  | 10259          | 11.1 (4.5)                      | 4        | 57 (16.1)             | 4531 (44)    | 693                         | 228                          |
| CGPS <sup>2</sup>                                | Denmark     | Population register  | 2003-present             | 32038          | 1.8 (1.0)                       | 4        | 57 (13.6)             | 13,757 (43)  | 188                         | 899                          |
| CHS <sup>3</sup>                                 | USA         | GP lists             | 1989-93                  | 5342           | 9.5 (3.6)                       | 5        | 73 (5.3)              | 2256 (42)    | 920                         | 515                          |
| EAS                                              | Scotland    | GP lists             | 1987-88                  | 907            | 12.5 (4.9)                      | 3        | 64 (5.6)              | 449 (50)     | 61                          | 28                           |
| ELSA                                             | England     | Household listings   | 1998-2001                | 5496           | 6.6 (1.5)                       | 3        | 61 (9.5)              | 2509 (46)    | 105                         | 230                          |
| FRAMOFF                                          | USA         | Household listings   | 1991-95                  | 1680           | 6.6 (1.4)                       | 13       | 62 (9.4)              | 840 (50)     | 48                          | 84                           |
| HEALTHABC*                                       | USA         | Population screening | 2000-present             | 1660           | –                               | 7        | 70-79 (range)         | ~830 (50)    | 584                         | 0                            |
| NPHSII <sup>4</sup>                              | England     | GP lists             | 1989-94                  | 2282           | 11.9 (3.1)                      | 3        | 57 (3.5)              | 2282 (100)   | 108                         | 0                            |
| PROSPER <sup>†</sup>                             | UK,         | Population screening | 1998                     | 5777           | 3.1 (0.8)                       | 3        | 75 (3.4)              | 2794 (48)    | 480                         | 772                          |
| ROTTERDAM <sup>5</sup>                           | Netherlands | Population register  | 1990-93                  | 5732           | 10.3 (3.8)                      | 3        | 69 (8.4)              | 2379 (42)    | 282                         | 667                          |
| WHITEI <sup>1</sup>                              | England     | Occupational         | 1985-88                  | 5988           | 11.3 (0.5)                      | 3        | 49 (6.0)              | 4282 (72)    | 0                           | 230                          |
| WOSCOPS <sup>4,†</sup>                           | Scotland    | Population screening | 1989-91                  | 1451           | 4.4 (1.3)                       | 1        | 57 (5.2)              | 1451 (100)   | 279                         | 0                            |
| <b>Nested case-control: Individually matched</b> |             |                      |                          |                |                                 |          |                       |              |                             |                              |
| EPICNL                                           | Netherlands | Population register  | 1993-1997                | 3507           | 9.6 (2.5)                       | 4        | 53 (10.9)             | 952 (27)     | 426                         | 0                            |
| EPICNOR                                          | England     | GP lists             | 1993-98                  | 3298           | –                               | 3        | 65 (7.8)              | 2106 (64)    | 1102                        | 0                            |
| HPFS <sup>6</sup>                                | USA         | Occupational         | 1994                     | 781            | 12.9 (1.7)                      | 6        | 57 (8.4)              | 781 (100)    | 231                         | 0                            |
| NHS <sup>6</sup>                                 | USA         | Occupational         | 1990                     | 744            | 10.7 (2.3)                      | 6        | 57 (6.5)              | 0 (0)        | 243                         | 0                            |
| NSC                                              | Sweden      | Population register  | 1985-99                  | 1673           | 3.6 (2.5)                       | 4        | 55 (7.8)              | 1215 (73)    | 585                         | 0                            |
| <b>Frequency</b>                                 |             |                      |                          |                |                                 |          |                       |              |                             |                              |
| CAPS <sup>1</sup>                                | England     | Electoral rolls      | 1979-83                  | 1157           | 9.0 (3.5)                       | 3        | 57 (4.4)              | 1157 (100)   | 202                         | 3                            |
| 4D <sup>†</sup>                                  | Germany     | GP lists             | 1998-2002                | 897            | 3.0 (1.5)                       | 25       | 66 (8.0)              | 492 (55)     | 273                         | 0                            |
| MALMO                                            | Sweden      | Population screening | 1991-94                  | 2148           | 5.8 (2.2)                       | 4        | 63 (6.4)              | 1637 (76)    | 613                         | 459                          |
| SPEED <sup>1</sup>                               | England     | GP lists             | 1979-82                  | 854            | 24.0 (4.0)                      | 4        | 54 (4.2)              | 854 (100)    | 93                          | 1                            |
| WHIOS                                            | USA         | Population screening | 1991                     | 4390           | 8.6 (3.4)                       | 4        | 68 (7.0)              | 0 (0)        | 1524                        | 0                            |
| <b>Subtotal (27 studies)</b>                     |             |                      |                          | 124,931        | 9.6 (2.7)                       |          | 61 (10.3)             | 60,253 (48)  | 10,981                      | 5241                         |

| Study / design                         | Location      | Population source                       | Years of baseline survey | Total subjects | No. SNPs | Age (years) mean (SD) | No. (%) Male | Prevalent cases <sup>‡</sup> |
|----------------------------------------|---------------|-----------------------------------------|--------------------------|----------------|----------|-----------------------|--------------|------------------------------|
| <b>Retrospective studies</b>           |               |                                         |                          |                |          |                       |              |                              |
| <i>Case-control, frequency matched</i> |               |                                         |                          |                |          |                       |              |                              |
| BHF-FHS                                | England       | Population register                     | 1998-2003                | 4548           | 4        | 51 (13.3)             | 2896 (64)    | 2157                         |
| CHAOS                                  | England       | Hospital admissions/ general population | 1992-94                  | 2475           | 4        | 56 (9.4)              | 1283 (52)    | 650                          |
| CIHDS <sup>2</sup>                     | Denmark       | Hospital admissions/ general population | 1991-2004                | 6716           | 4        | 61 (10.5)             | 4861 (72)    | 2236                         |
| CRPHANS                                | China         | Hospital admissions/ general population | 2008-2010                | 902            | 2        | 60 (9.6)              | 652 (72)     | 479                          |
| CUDAS                                  | Australia     | Electoral rolls                         | 1998; 1995-96            | 1107           | 2        | 53 (12.7)             | 557 (50)     | 59                           |
| CUPID                                  | Australia     | Hospital admissions                     | 1995                     | 555            | 2        | 50 (5.1)              | 484 (87)     | 353                          |
| GERMIFS*                               | Germany       | Population screening                    | 1997-2002                | 2911           | 12       | 58 (8.7)              | 1979 (68)    | 1084                         |
| GISSI-P <sup>†</sup>                   | Italy         | Hospital admission / general population | 1993-95                  | 4034           | 4        | 59 (9.8)              | 3274 (81)    | 3054                         |
| HIFMECH <sup>4</sup>                   | Europe        | Hospital admissions/ general population | 1996-98                  | 1008           | 1        | 52 (5)                | 1006 (100)   | 490                          |
| HIMS <sup>1</sup>                      | Australia     | Population register                     | 2004-04                  | 4194           | 3        | 72 (4.2)              | 4194 (100)   | 585                          |
| HVHS                                   | USA           | GP lists                                | 1995-2002                | 4833           | 11       | 65 (9.8)              | 2111 (44)    | 1162                         |
| INTERHEART <sup>7</sup>                | International | Hospital admissions/ general population | 1999-2003                | 8666           | 16       | 56 (12)               | 6904 (80)    | 3969                         |
| ISIS <sup>7</sup>                      | UK            | Hospital admissions/ general population | 1989-91                  | 3618           | 8        | 50 (8.7)              | 2239 (62)    | 2107                         |
| LOLIPOP <sup>*,7</sup>                 | UK            | General population                      | 2000-                    | 4712           | 26       | 59 (9.7)              | 3864 (82)    | 2538                         |
| LURIC <sup>8</sup>                     | Germany       | Hospital admissions                     | 1997-2000                | 2808           | 24       | 63 (11)               | 1942 (69)    | 1167                         |
| PENNCATH*                              | USA           | Hospital admissions                     | 1998-2003                | 1516           | 16       | 59 (10)               | 1000 (66)    | 1027                         |
| PROCARDIS <sup>7</sup>                 | Europe        | Hospital admissions/ general population | 1998-present             | 6505           | 17       | 61 (8.8)              | 3860 (59)    | 3156                         |
| PROMIS                                 | Pakistan      | Hospital admissions                     | 2006-09                  | 3694           | 26       | 53 (10.6)             | 3055 (83)    | 1813                         |
| UCP <sup>†</sup>                       | Netherlands   | Population register                     | 1985-present             | 2014           | 4        | 64 (10.1)             | 1322 (66)    | 1089                         |
| SHEEP                                  | Sweden        | GP lists, electoral roles               | 1992-94                  | 2671           | 3        | 60 (7.2)              | 1840 (69)    | 1160                         |
| <b>Subtotal (20 studies)</b>           |               |                                         |                          | 69,487         |          | 58 (9.8)              | 49,323 (71)  | 30,335                       |
| <b>TOTAL (47 studies)</b>              |               |                                         |                          | 194,418        | 41       | 59 (10.1)             | 109,576 (56) | 35,576                       |

‡ Cases were defined as fatal or non-fatal myocardial infarction, coronary death or  $\geq 50\%$  stenosis of at least 1 major coronary vessel (details in **eTable 5**); \* Studies have contributed tabular data; † Randomised controlled trials; <sup>1</sup> Lawlor, *PLoS One* 2008; <sup>2</sup> Zacho, *NEJM* 2008; <sup>3</sup> Lange, *JAMA* 2006; <sup>4</sup> Casas, *IJE* 2006; <sup>5</sup> Kardys, *Eur Heart J*, 2006; <sup>6</sup> Pai, *PLoS One* 2008; <sup>7</sup> Elliot, *JAMA* 2009; <sup>8</sup> Grammer, *Eur Heart J*, 2009. Overall standard deviations (SD) for age were estimated accounting for sample size of contributing studies; Study acronyms are listed in **eAppendix 1**.

**Table C.** Median CRP concentration and laboratory methods for biochemical analysis in 36 studies with circulating CRP measurements in the CCGC.

| <b>Study</b> | <b>Median CRP concentration (5<sup>th</sup>, 95<sup>th</sup> pctiles)</b> | <b>Fasting status at blood sampling / duration</b> | <b>Sampling source</b> | <b>Time between collection and measurement</b> | <b>Sample state before analyses, storage temperature (°C) if frozen</b> | <b>Assay method (source)</b> | <b>Assay standard</b> |
|--------------|---------------------------------------------------------------------------|----------------------------------------------------|------------------------|------------------------------------------------|-------------------------------------------------------------------------|------------------------------|-----------------------|
| AGES         | 2.0 (0.4 to 10.8)                                                         | Fasted / > 8hrs                                    | Serum                  | > 10 yrs                                       | Frozen, -20                                                             | ITA (Roche Diagnostics)      | Manufacturer          |
| ARIC         | 2.1 (0.3 to 11.3)                                                         | Fasted / > 8 hrs                                   | Plasma                 | > 10 yrs                                       | Frozen, -70                                                             | ITA (Denka Seiken)           | Manufacturer          |
| BRHS         | 1.2 (0.2 to 8.5)                                                          | Non-fasted                                         | Serum                  | > 10 yrs                                       | Frozen, -20                                                             | MEIA (Abbott)                | WHO 85/506            |
| BWHHS        | 1.8 (0.2 to 9.8)                                                          | Fasted / > 8 hrs                                   | Serum                  | 1 - 2 yrs                                      | Frozen, -80                                                             | INA ( Behring)               | Manufacturer          |
| CAPS         | 1.7 (0.3 to 8.2)                                                          | Fasted / > 8 hrs                                   | Plasma                 | > 10 yrs                                       | Frozen, -70                                                             | INA ( Behring)               | Who 85/506            |
| CCHS         | 1.7 (0.7 to 9.6)                                                          | Non-fasted                                         | Plasma                 | > 10 yrs                                       | Fresh or frozen                                                         | INA, ITA (Dade Behring)      | Manufacturer          |
| CGPS         | 1.5 (0.4 to 8.8)                                                          | Non-fasted                                         | Plasma                 | Fresh                                          | Fresh                                                                   | INA, ITA (Dade Behring)      | Manufacturer          |
| CHS          | 2.5 (0.5 to 15.5)                                                         | Fasted / > 8 hrs                                   | Plasma                 | 5 - 10 yrs                                     | Frozen, -70                                                             | ELISA (In-house)             | WHO 85/506            |
| CIHDS        | 1.6 (0.4 to 8.9)                                                          | Non-fasted                                         | Plasma                 | Fresh                                          | Fresh                                                                   | INA, ITA (Dade Behring)      | Manufacturer          |
| CUDAS        | 1.7 (0.3 to 11.8)                                                         | Fasted / > 8 hrs                                   | Serum                  | NS                                             | Frozen, -70                                                             | ITA (Roche Diagnostics)      | Manufacturer          |
| CUPID        | 2.0 (0.4 to 12.0)                                                         | Fasted / > 8 hrs                                   | Serum                  | NS                                             | Frozen, -70                                                             | ITA (Roche Diagnostics)      | Manufacturer          |
| 4D           | 4.9 (0.7 to 39.1)                                                         | Non-fasted                                         | NS                     | NS                                             | Frozen, -80                                                             | ITA (Roche Diagnostics)      | Manufacturer          |
| EAS          | 1.8 (0.4 to 10.8)                                                         | Fasted / > 8 hrs                                   | Serum                  | > 10 yrs                                       | Frozen, -50                                                             | INA ( Behring)               | Manufacturer          |
| ELSA         | 1.9 (0.3 to 12.4)                                                         | Fasted / NS                                        | Serum                  | Fresh                                          | Fresh                                                                   | INA (Behring)                | Manufacturer          |
| EPICNL       | 1.5 (0.3 to 9.4)                                                          | Non-fasted                                         | Plasma                 | Fresh                                          | Fresh                                                                   | ITA (Beckman Coulter)        | Manufacturer          |
| EPICNOR      | 1.7 (0.3 to 14.7)                                                         | Non-fasted                                         | Serum                  | NS                                             | Frozen, -80                                                             | ELISA (Sanquin Res)          | Manufacturer          |
| FRAMOFF      | 2.2 (0.4 to 14.3)                                                         | Fasted / > 8 hrs                                   | Plasma                 | 1 - 4 yrs                                      | Frozen, -70                                                             | ELISA (Behring)              | WHO 85/506            |
| HIFMECH      | 1.2 (0.1 to 8.0)                                                          | Fasted / > 8 hrs                                   | Plasma                 | 1 - 4 yrs                                      | Frozen, -70                                                             | ELISA (Dako)                 | Manufacturer          |
| HIMS         | 1.9 (0.4 to 11.9)                                                         | Fasted / NS                                        | NS                     | Fresh                                          | Fresh                                                                   | INA (Dade Behring)           | Manufacturer          |
| HPFS         | 1.3 (0.2 to 11.6)                                                         | Fasted / NS                                        | Plasma                 | 5 - 10 yrs                                     | Frozen, -130                                                            | ITA (Denka Seiken)           | Manufacturer          |
| ISIS         | 1.1 (0.2 to 7.6)                                                          | Non-fasted                                         | Plasma                 | > 10 yrs                                       | Frozen, -40                                                             | INA (Dade Behring)           | Manufacturer          |
| LURIC        | 2.8 (0.4 to 26.5)                                                         | Fasted / NS                                        | Plasma                 | 1 - 4 yrs                                      | Frozen, -80                                                             | INA (Behring)                | Manufacturer          |
| MALMO        | 1.6 (0.3 to 13.0)                                                         | Fasted / > 8 hrs                                   | Plasma                 | >10 yrs                                        | Frozen, -80                                                             | ITA (Roche Diagnostics)      | Manufacturer          |
| MONICAKORA   | 1.6 (0.2 to 9.5)                                                          | Non-fasted                                         | Plasma                 | 2 - 12 yrs                                     | Frozen, -80                                                             | IRMA, INA (Dade Behring)     | WHO 85/506            |
| NHS          | 2.4 (0.3 to 15.2)                                                         | Fasted / NS                                        | Plasma                 | 5 - 10 yrs                                     | Frozen, -130                                                            | ITA (Denka Seiken)           | Manufacturer          |
| NPHSII       | 2.6 (0.5 to 12.6)                                                         | Non-fasted                                         | Serum                  | > 5 yrs                                        | Frozen, -40                                                             | ELISA (Cordia)               | Manufacturer          |
| NSC          | 1.5 (0.3 to 9.2)                                                          | Fasted / 4-8 hrs                                   | Plasma                 | > 5 yrs                                        | Frozen, -80                                                             | CIA (Immulite )              | WHO 85/506            |
| PROCARDIS    | 1.2 (0.2 to 8.0)                                                          | Non-fasted                                         | Plasma                 | 5 - 10 yrs                                     | Frozen, -80                                                             | INA (Dade Behring)           | Manufacturer          |
| PROMIS       | 2.3 (0.4 to 32.2)                                                         | Non-fasted                                         | Serum                  | 1 week - 1 yr                                  | Frozen, -80                                                             | ELISA (Dako)                 | Manufacturer          |
| PROSPER      | 3.1 (0.5 to 19.4)                                                         | Fasted / > 8 hrs                                   | Plasma                 | 1 - 5 yrs                                      | Frozen, -80                                                             | ITA (Roche Diagnostics)      | cFas calibrator       |
| ROTTERDAM    | 1.8 (0.3 to 9.6)                                                          | Non-fasted                                         | Serum                  | > 10 yrs                                       | Frozen, -20                                                             | INA (Immage)                 | Manufacturer          |
| SHEEP        | 1.2 (0.2 to 8.7)                                                          | Fasted / NS                                        | Plasma                 | 5 - 10 yrs                                     | Frozen, -70                                                             | INA (Dade-Behring)           | NS                    |
| SPEED        | 1.2 (0.2 to 8.2)                                                          | Fasted / > 8 hrs                                   | Plasma                 | NS                                             | Frozen, -20                                                             | INA (Behring)                | WHO 85/506            |
| WHIOS        | 1.7 (0.1 to 15.1)                                                         | Fasted / > 8 hrs                                   | Plasma                 | < 10 yrs                                       | Frozen, -70                                                             | ITA (Roche Diagnostics)      | Manufacturer          |
| WHITEII      | 0.8 (0.1 to 6.5)                                                          | Fasted / NS                                        | Serum                  | > 10 yrs                                       | Frozen, -80                                                             | INA (Behring)                | Manufacturer          |
| WOSCOPS      | 2.0 (0.3 to 10.4)                                                         | Fasted / > 8 hrs                                   | Plasma                 | 10 yrs                                         | Frozen, -70                                                             | ELISA (In-house)             | IFCC CRM470           |

CIA = chemiluminescence immunoassay; ELISA = enzyme-linked immunosorbent assay; INA = immunonephelometric assay; IRMA = immunoradiometric assay; ITA = immunoturbidimetry assay; WHO = World Health Organization; NS = not specified; Study acronyms are listed in appendix 2.

**Table D** Laboratory methods and quality control measures for measurement of CRP SNPs in 47 studies in the CCGC.

| Study      | DNA source/Type                | Genotyping methods                   | Quality control                  |                   |                   |
|------------|--------------------------------|--------------------------------------|----------------------------------|-------------------|-------------------|
|            |                                |                                      | Scrambling of cases and controls | Negative controls | Positive controls |
| AGES       | Whole blood/Native             | Illumina 370CNV BeadChip array       | ✓                                | □                 | □                 |
| ARIC       | Whole blood/Native             | TaqMan                               | ✓                                | □                 | ✓                 |
| BHF-FHS    | Leukocyte DNA/Native           | Multiplex                            | □                                | □                 |                   |
| BRHS       | Whole blood/Native             | TaqMan                               | ✓                                | ✓                 | ✓                 |
| BWHHS      | Whole blood/Native             | Kbioscience                          | ✓                                | ✓                 | ✓                 |
| CAPS       | Whole blood/Native             | Kbioscience                          | ✓                                | ✓                 | ✓                 |
| CCHS       | Whole blood/Native             | TaqMan                               | ✓                                | ✓                 | NS                |
| CGPS       | Whole blood/Native             | TaqMan                               | ✓                                | ✓                 | NS                |
| CHAOS      | Whole blood/Native             | TaqMan                               | ✓                                | ✓                 | ✓                 |
| CHS        | Whole blood/Native             | TaqMan                               | ✓                                | ✓                 | NS                |
| CIHDS      | Whole blood/Native             | TaqMan                               | ✓                                | ✓                 | NS                |
| CRPHANS    | Whole blood/WGA                | TaqMan                               | ✓                                | ✓                 | ✓                 |
| CUDAS      | Whole blood/Native             | TaqMan                               | ✓                                | ✓                 | NS                |
| CUPID      | Whole blood/Native             | TaqMan                               | ✓                                | ✓                 | NS                |
| 4D         | Whole blood/Native             | Illumina IBC 50K SNP array           | □                                | □                 | □                 |
| EAS        | Whole blood/Native             | TaqMan                               | ✓                                | ✓                 | ✓                 |
| ELSA       | Whole blood/Native             | TaqMan                               | ✓                                | ✓                 | ✓                 |
| EPICNL     | Whole blood/Native             | Illumina IBC 50K SNP array           | □                                | ✓                 | ✓                 |
| EPICNOR    | Whole blood/Native             | TaqMan                               | ✓                                | ✓                 | ✓                 |
| FRAMOFF    | Whole blood/Native             | Multiplex                            | □                                | □                 | ✓                 |
| GERMIFS    | Whole blood/Native             | Affymetrix 500K or 6.0 Chip          | □                                | □                 | □                 |
| GISSI-P    | Whole blood/Native             | TaqMan                               | ✓                                | ✓                 | ✓                 |
| HEALTHABC  | Whole blood/Native             | Illumina Human 1-MDuo                | ✓                                | ✓                 | ✓                 |
| HIFMECH    | Whole blood/Native             | PCR / RFLP                           | ✓                                | ✓                 | NS                |
| HIMS       | Whole blood/Native             | TaqMan                               | ✓                                | ✓                 | NS                |
| HPFS       | Whole blood/Native             | TaqMan                               | ✓                                | ✓                 | NS                |
| HVHS       | Whole blood/Native             | Illumina Golden Gate, Sequenom iPLEX | □                                | □                 | □                 |
| INTERHEART | Whole blood/Native             | Illumina Golden Gate, Sequenom iPLEX | ✓                                | □                 | □                 |
| ISIS       | Whole blood/Native             | Taqman                               | ✓                                | ✓                 | ✓                 |
| LOLIPOP    | Whole blood/Native             | Illumina IBC 50K SNP array           | □                                | □                 | □                 |
| LURIC      | Whole blood/Native             | Illumina IBC 50K SNP array           | □                                | □                 | □                 |
| MALMO      | Granulocyte preparation/Native | Multiplex                            | ✓                                | NS                | NS                |
| MONICAKORA | Whole blood/Native             | Illumina IBC 50K SNP array           | ✓                                | □                 | □                 |
| NHS        | Whole blood/Native             | TaqMan                               | ✓                                | ✓                 | NS                |
| NPHSII     | Whole blood/Native             | PCR / RFLP                           | ✓                                | ✓                 | NS                |
| NSC        | Whole blood/Native             | TaqMan                               | ✓                                | ✓                 | ✓                 |
| PENNCATH   | Whole blood/Native             | Illumina IBC 50K SNP array           | □                                | □                 | □                 |
| PROCARDIS  | Whole blood/Native             | Illumina IBC 50K SNP array           | □                                | □                 | □                 |
| PROMIS     | Whole blood/Native             | Illumina IBC 50K SNP array           | □                                | □                 | □                 |
| PROSPER    | Whole blood/Native             | TaqMan                               | ✓                                | ✓                 | □                 |
| ROTTERDAM  | Whole blood/Native             | TaqMan                               | NS                               | ✓                 | ✓                 |
| SHEEP      | Whole blood/Native             | TaqMan                               | ✓                                | ✓                 | ✓                 |
| SPEED      | Whole blood/Native             | Kbioscience                          | ✓                                | ✓                 | ✓                 |
| UCP        | Buccal swab (saliva) /Native   | Illumina IBC 50K SNP array           | ✓                                | ✓                 | ✓                 |
| WHIOS      | Whole blood/Native             | Illumina IBC 50K SNP array           | ✓                                | ✓                 | ✓                 |
| WHITEII    | Whole blood/Native             | TaqMan, Geneservice                  | ✓                                | ✓                 | ✓                 |
| WOSCOPS    | Whole blood/Native             | PCR / RFLP                           | □                                | □                 | □                 |

IBC = ITMAT-Broad-CARe; PCR = polymerase chain reaction; RFLP = restriction fragment length polymorphism; WGA = whole genome amplification; SNP = single nucleotide polymorphism; ✓ = Criterion included in quality control; □ = Criterion not included in quality control or not applicable. NS = not specified; Study acronyms are listed in appendix 2.

**Table E.** Characterisation of coronary disease outcomes in studies contributing to the CCGC.

| Study      | Definition of Endpoints |                   |     |                 | Coronary Stenosis <sup>+</sup> |
|------------|-------------------------|-------------------|-----|-----------------|--------------------------------|
|            | Death                   | Non-fatal MI      |     |                 |                                |
|            |                         | Clinical features | ECG | Cardiac markers |                                |
| AGES       | ***                     | ✓                 | ✓   | ✓               | -                              |
| ARIC       | ***                     | ✓                 | ✓   | ✓               | -                              |
| BHF-FHS    | *                       | ✓                 | ✓   | ✓               | >50%                           |
| BRHS       | **                      | ✓                 | ✓   | ✓               | -                              |
| BWHHS      | ***                     | ✓                 | ✓   | ✓               | -                              |
| CAPS       | ***                     | ✓                 | ✓   | -               | -                              |
| CCHS       | ***                     | ✓                 | ✓   | ✓               | -                              |
| CGPS       | ***                     | ✓                 | ✓   | ✓               | -                              |
| CHAOS      | *                       | ✓                 | ✓   | ✓               | >50%                           |
| CHS        | ***                     | ✓                 | ✓   | ✓               | -                              |
| CIHDS      | ***                     | ✓                 | ✓   | ✓               | >50%                           |
| CRPHANS    | ***                     | ✓                 | ✓   | ✓               | -                              |
| CUDAS      | *                       | - <sup>1</sup>    | -   | -               | -                              |
| CUPID      | *                       | - <sup>2</sup>    | -   | -               | -                              |
| 4D         | ***                     | ✓                 | ✓   | ✓               | -                              |
| EAS        | ***                     | ✓                 | ✓   | ✓               | -                              |
| ELSA       | *                       | - <sup>3</sup>    | -   | -               | -                              |
| EPICNL     | **                      | - <sup>1</sup>    | -   | -               | -                              |
| EPICNOR    | **                      | ✓                 | ✓   | ✓               | -                              |
| FRAMOFF    | ***                     | ✓                 | ✓   | ✓               | -                              |
| GERMIFS    | *                       | ✓                 | ✓   | ✓               | -                              |
| GISSI-P    | *                       | ✓                 | ✓   | ✓               | -                              |
| HEALTHABC  | ***                     | ✓                 | ✓   | ✓               | -                              |
| HIFMECH    | *                       | ✓                 | ✓   | ✓               | -                              |
| HIMS       | ***                     | - <sup>1</sup>    | -   | -               | -                              |
| HPFS       | ***                     | ✓                 | ✓   | ✓               | -                              |
| HVHS       | *                       | ✓                 | ✓   | ✓               | -                              |
| INTERHEART | *                       | ✓                 | ✓   | ✓               | -                              |
| ISIS       | *                       | ✓                 | ✓   | ✓               | -                              |
| LOLIPOP    | *                       | ✓                 | ✓   | ✓               | -                              |
| LURIC      | ***                     | ✓                 | ✓   | ✓               | -                              |
| MALMO      | ***                     | ✓                 | ✓   | ✓               | -                              |
| MONICAKORA | ***                     | ✓                 | ✓   | ✓               | -                              |
| NHS        | ***                     | ✓                 | ✓   | ✓               | -                              |
| NPHSII     | ***                     | ✓                 | ✓   | ✓               | -                              |
| NSC        | ***                     | ✓                 | ✓   | ✓               | -                              |
| PENNCATH   | *                       | -                 | ✓   | ✓               | >50%                           |
| PROCARDIS  | *                       | ✓                 | ✓   | ✓               | >50%                           |
| PROMIS     | *                       | ✓                 | ✓   | ✓               | -                              |
| PROSPER    | ***                     | ✓                 | ✓   | ✓               | -                              |
| ROTTERDAM  | ***                     | ✓                 | ✓   | ✓               | -                              |
| SHEEP      | *                       | ✓                 | ✓   | ✓               | -                              |
| SPEED      | ***                     | ✓                 | ✓   | ✓               | -                              |
| UCP        | *                       | - <sup>1</sup>    | -   | -               | -                              |
| WHIOS      | *                       | ✓                 | ✓   | ✓               | -                              |
| WHITE2     | **                      | ✓                 | ✓   | ✓               | -                              |
| WOSCOPS    | ***                     | ✓                 | ✓   | ✓               | -                              |

\*: Non-fatal events only; \*\*: death certificate only; \*\*\*: death certificate supplemented by medical record

✓: Feature included in criteria; -: feature not included in criteria

<sup>+</sup> As determined by angiography, reported stenosis of at least 1 major coronary vessel

<sup>1</sup> Diagnosis obtained from hospital case records; <sup>2</sup> History of hospitalization with MI; <sup>3</sup> self-reported history of MI  
Study acronyms are listed in appendix 2.

**Table F.** Association of CRP SNPs or haplotypes with CRP levels and categorical variables.

|                   | Minor allele Frequency | Per allele or in comparison with reference haplotype % change in CRP (95% CI) | P-value for association with: |                        |                   |                |                     |
|-------------------|------------------------|-------------------------------------------------------------------------------|-------------------------------|------------------------|-------------------|----------------|---------------------|
|                   |                        |                                                                               | Sex                           | Ethnicity              | Diabetes mellitus | Smoking status | Alcohol consumption |
| <b>SNPs</b>       |                        |                                                                               |                               |                        |                   |                |                     |
| rs3093077         | 0.06                   | 22.9% (19.0%, 27.0%)                                                          | 0.854                         | 1.00x10 <sup>-40</sup> | 0.921             | 0.537          | 0.051               |
| rs1205            | 0.33                   | 19.4% (17.4%, 21.5%)                                                          | 0.107                         | 4.41x10 <sup>-21</sup> | 0.685             | 0.005          | 0.017               |
| rs1130864         | 0.30                   | 14.1% (12.5%, 15.8%)                                                          | 0.973                         | 1.00x10 <sup>-40</sup> | 0.890             | 0.038          | 0.793               |
| rs1800947         | 0.06                   | 29.9% (25.6%, 34.3%)                                                          | 0.305                         | 1.25x10 <sup>-30</sup> | 0.903             | 0.679          | 0.960               |
| <b>Haplotypes</b> |                        |                                                                               |                               |                        |                   |                |                     |
| (1) T / C / T / G | 0.30                   | Reference*                                                                    | Ref                           | -                      | Ref               | Ref            | Ref                 |
| (2) T / C / C / G | 0.24                   | -9.3% (-10.8%, -7.8%)                                                         | 0.703                         | -                      | 0.682             | 0.820          | 0.428               |
| (3) G / C / C / G | 0.05                   | 10.9% (8.3%, 13.5%)                                                           | 0.662                         | -                      | 0.649             | 0.766          | 0.032               |
| (4) T / T / C / G | 0.13                   | -17.7% (-19.3%, -16.1%)                                                       | 0.524                         | -                      | 0.094             | 0.048          | 0.420               |
| (5) T / T / C / C | 0.03                   | -29.0% (-31.8%, -26.1%)                                                       | 0.217                         | -                      | 0.732             | 0.246          | 0.985               |
| (6) ? / C / C / G | 0.07                   | -6.7% (-10.4%, -2.9%)                                                         | 0.532                         | -                      | 0.391             | 0.049          | 0.324               |
| (7) T / T / C / ? | 0.18                   | -17.9% (-20.1%, -15.7%)                                                       | 0.189                         | -                      | 0.211             | 0.049          | 0.104               |

\* % change in CRP is shown per addition of each haplotype compared to 2 copies of reference haplotype 1.

**Table G.** Summary of data available on circulating biomarkers and associations with CRP levels.

|                                                        | Summary of available data |                     |                | Association with log <sub>e</sub> CRP value                                                                         |
|--------------------------------------------------------|---------------------------|---------------------|----------------|---------------------------------------------------------------------------------------------------------------------|
|                                                        | No. of studies            | No. of participants | Mean (SD) or % | Difference (95% CI) in log <sub>e</sub> CRP levels per 1-SD increase or compared to reference category <sup>‡</sup> |
| Log <sub>e</sub> CRP (mg/l)                            | 35                        | 111,158             | 0.62 (1.05)    |                                                                                                                     |
| Age at survey (years)                                  | 35                        | 111,158             | 60 (11)        | 0.16 (0.13 to 0.20)                                                                                                 |
| <b><i>Anthropometric markers</i></b>                   |                           |                     |                |                                                                                                                     |
| Body Mass Index (kg/m <sup>2</sup> )                   | 33                        | 108,199             | 27 (4)         | 0.31 (0.28 to 0.34)                                                                                                 |
| Height (cm)                                            | 31                        | 103,730             | 170 (9)        | -0.07 (-0.08 to -0.06)                                                                                              |
| Weight (kg)                                            | 30                        | 101,440             | 76 (14)        | 0.28 (0.25 to 0.31)                                                                                                 |
| Waist/hip ratio                                        | 20                        | 85,204              | 0.90 (0.28)    | 0.91 (0.75 to 1.08)                                                                                                 |
| Systolic Blood Pressure (mmHg)                         | 33                        | 108,054             | 138 (21)       | 0.12 (0.09 to 0.14)                                                                                                 |
| Diastolic Blood Pressure (mmHg)                        | 33                        | 108,029             | 81 (11)        | 0.08 (0.06 to 0.11)                                                                                                 |
| <b><i>Lipid and metabolic markers</i></b>              |                           |                     |                |                                                                                                                     |
| Total cholesterol (mmol/l)                             | 34                        | 107,532             | 5.8 (1.1)      | 0.03 (0.01 to 0.05)                                                                                                 |
| HDL cholesterol (mmol/l)                               | 33                        | 105,182             | 1.31 (0.44)    | -0.26 (-0.29 to -0.23)                                                                                              |
| non-HDL cholesterol (mmol/l)                           | 33                        | 105,160             | 4.49 (1.11)    | 0.10 (0.08 to 0.12)                                                                                                 |
| Apolipoprotein A-I (g/l)                               | 16                        | 71,404              | 1.49 (0.29)    | -0.18 (-0.23 to -0.14)                                                                                              |
| Apolipoprotein B (g/l)                                 | 18                        | 73,179              | 1.06 (0.31)    | 0.12 (0.09 to 0.16)                                                                                                 |
| Log <sub>e</sub> Triglycerides (mmol/l)                | 32                        | 98,811              | 0.40 (0.52)    | 0.21 (0.18 to 0.23)                                                                                                 |
| Fasting Glucose (mmol/l)                               | 24                        | 82,599              | 5.9 (1.6)      | 0.11 (0.09 to 0.13)                                                                                                 |
| <b><i>Inflammatory markers</i></b>                     |                           |                     |                |                                                                                                                     |
| Fibrinogen (μmol/l)                                    | 25                        | 82,885              | 9.7 (2.5)      | 0.67 (0.57 to 0.78)                                                                                                 |
| Albumin (g/l)                                          | 9                         | 22,467              | 43 (4)         | -0.22 (-0.29 to -0.15)                                                                                              |
| Log <sub>e</sub> interleukin 6 (ng/l)                  | 13                        | 22,148              | 0.73 (0.71)    | 0.54 (0.44 to 0.63)                                                                                                 |
| Log <sub>e</sub> leukocyte count (x10 <sup>9</sup> /l) | 11                        | 21,209              | 1.86 (0.27)    | 0.33 (0.30 to 0.37)                                                                                                 |
| <b><i>Categorical variables</i></b>                    |                           |                     |                |                                                                                                                     |
| Sex                                                    | 35                        | 111,158             |                |                                                                                                                     |
| Male                                                   | 32                        | 57,897              | 52%            | Ref                                                                                                                 |
| Female                                                 | 27                        | 53,261              | 48%            | 0.09 (0.05 to 0.14)                                                                                                 |
| Ethnicity                                              | 33                        | 105,727             |                |                                                                                                                     |
| White                                                  | 33                        | 107,304             | 97%            | Ref                                                                                                                 |
| Black                                                  | 8                         | 1285                | 1%             | 0.42 (0.04 to 0.81)                                                                                                 |
| Asian                                                  | 5                         | 1533                | 1%             | -0.08 (-0.74 to 0.57)                                                                                               |
| Smoking status                                         | 35                        | 109,551             |                |                                                                                                                     |
| Not Current                                            | 35                        | 96,979              | 89%            | Ref                                                                                                                 |
| Current                                                | 32                        | 12,572              | 11%            | 0.33 (0.28 to 0.37)                                                                                                 |
| History of diabetes                                    | 35                        | 108,469             |                |                                                                                                                     |
| No                                                     | 34                        | 101,208             | 93%            | Ref                                                                                                                 |
| Yes                                                    | 34                        | 7261                | 7%             | 0.31 (0.24 to 0.38)                                                                                                 |
| Alcohol consumption                                    | 31                        | 99,699              |                |                                                                                                                     |
| Other                                                  | 27                        | 28,699              | 29%            |                                                                                                                     |
| Current                                                | 27                        | 7,1000              | 71%            | -0.08 (-0.11 to -0.04)                                                                                              |

<sup>‡</sup> Difference in log<sub>e</sub> CRP per 1 standard deviation (SD) increase in the row variable (or, for categorical variables, the difference in mean log<sub>e</sub> CRP levels compared to the reference category) adjusted for sex and age. Study-specific estimates were combined using random effects meta-analysis. CI = confidence intervals; HDL = high density lipoprotein.



**Table H.** Subgroup analyses for associations between each SNP and CHD risk.

|                                              | rs3093077                      | rs1205 | rs1130864 | rs1800947 |
|----------------------------------------------|--------------------------------|--------|-----------|-----------|
| <b>Individual-level characteristics</b>      | <b>P-value for interaction</b> |        |           |           |
| Sex                                          | 0.303                          | 0.152  | 0.402     | 0.507     |
| Age at survey (yrs)                          | 0.825                          | 0.182  | 0.216     | 0.730     |
| Smoking status (current vs. ex/never)        | 0.160                          | 0.795  | 0.197     | 0.792     |
| Alcohol status (Current vs. never)           | 0.311                          | 0.876  | 0.715     | 0.754     |
| History of diabetes (definite vs. other)     | 0.086                          | 0.961  | 0.690     | 0.481     |
| Ethnicity (white vs non-white)               | 0.500                          | 0.961  | 0.616     | 0.931     |
| Systolic BP (mmHg)                           | 0.161                          | 0.705  | 0.621     | 0.546     |
| BMI (kg/m <sup>2</sup> )                     | 0.814                          | 0.757  | 0.746     | 0.051     |
| Non-HDL-C (mmol/l)                           | 0.560                          | 0.633  | 0.819     | 0.818     |
| HDL-C (mmol/l)                               | 0.470                          | 0.885  | 0.076     | 0.896     |
| Total cholesterol (mmol/l)                   | 0.574                          | 0.941  | 0.045     | 0.457     |
| Log <sub>e</sub> triglyceride (mmol/l)       | 0.999                          | 0.241  | 0.637     | 0.174     |
| <b>Study-level characteristics</b>           | <b>Meta-regression P-value</b> |        |           |           |
| Large vs. small studies (</> 500cases)       | 0.971                          | 0.701  | 0.46      | .*        |
| Large vs. small studies (</> 1000 partic.)   | 0.272                          | 0.78   | 0.418     | .*        |
| Study design                                 | 0.86                           | 0.122  | 0.924     | 0.82      |
| Geographical region                          | 0.536                          | 0.159  | 0.827     | 0.257     |
| Population source                            | 0.501                          | 0.069  | 0.914     | 0.031     |
| Year of baseline survey                      | 0.33                           | 0.1    | 0.862     | 0.201     |
| Genotyping method                            | 0.729                          | 0.028  | 0.544     | 0.695     |
| Negative controls used on assay plates       | 0.558                          | 0.73   | 0.83      | 0.495     |
| Scrambling of cases / controls               | 0.536                          | 0.798  | 0.868     | 0.499     |
| Strong vs. weak studies (F statistic >/< 10) | 0.968                          | 0.339  | 0.44      | 0.712     |
| HWE P-value >/< 0.1                          | 0.519                          | 0.237  | 0.446     | 0.759     |

Continuous markers systolic blood pressure (BP), body mass index (BMI), non-high density lipoprotein cholesterol (HDL-C), HDL-C, total cholesterol and log<sub>e</sub> triglyceride were assessed by comparing thirds of baseline levels; Age was divided into 3 groups, 40-59 years, 60-69 years and 70+ years. Studies were grouped by study design (cohort, individually matched case control, frequency matched case control and clinical trial), geographical region (Western Europe, North America, Other), population source (GP lists, hospital admissions / general population, household listings, population register, population screening), year of baseline survey (pre-1990, 1990-1995, 1996-2000 and post-2000), genotyping methods (TaqMan, KBioscience, Illumina IBC 50K SNP array, PCR/RFLP, other multiplex methods), use of negative controls (ie, blank spaces) on assay plates, scrambling of cases and controls on assay plates, Hardy Weinberg Equilibrium P-value more than or less than 0.1 and strength of each SNP as an instrument of CRP (as depicted by the F-statistic). \*Insufficient data were available on subgroups of characteristic to estimate interaction with rs1800947.

**Table I.** Risk ratios for CHD per 1-SD higher log<sub>e</sub> CRP progressively adjusted for conventional and novel vascular risk factors.

|                                        | No studies | No participants | No cases | RR (95% CI)       | Wald X <sup>2</sup> <sub>1</sub> |
|----------------------------------------|------------|-----------------|----------|-------------------|----------------------------------|
| Adjusted for age, sex and trial arm    | 13         | 56,411          | 3274     | 1.63 (1.52, 1.74) | 212                              |
| ...Plus conventional risk factors      | 13         | 56,411          | 3274     | 1.28 (1.18, 1.38) | 37                               |
| ...Plus fibrinogen                     | 13         | 56,411          | 3274     | 1.22 (1.11, 1.33) | 17                               |
| Adjusted for age, sex and trial arm    | 7          | 9327            | 1392     | 1.61 (1.36, 1.91) | 30                               |
| ...Plus conventional risk factors      | 7          | 9327            | 1392     | 1.35 (1.19, 1.54) | 21                               |
| ...Plus log <sub>e</sub> interleukin-6 | 7          | 9327            | 1392     | 1.03 (0.85, 1.24) | 0.1                              |

RR = risk ratio; CI = confidence interval; Analyses were based on usual levels of circulating log<sub>e</sub> CRP and baseline levels of confounders; Conventional vascular risk factors adjusted for in model include: systolic blood pressure, smoking status, history of diabetes mellitus, BMI, HDL-C, non-HDL-C and log<sub>e</sub> triglyceride levels.
