# Supplementary material
Source: PubMed Central journal article supplement (PMC4788088)
Supplement: wenf806596.ww2_default.pdf [file wenf806596.ww2_default.pdf]

**Appendix 2: List of acronyms for the 47 studies collaborating in the C reactive Protein Coronary Heart Disease Genetics Collaboration [posted as supplied by author]**

| <b>Study Acronym</b> | <b>Study Name</b>                                                                                                             |
|----------------------|-------------------------------------------------------------------------------------------------------------------------------|
| <b>AGES</b>          | AGES Reykjavik Study: The Reykjavik Study of Healthy Aging for the New Millennium                                             |
| <b>ARIC</b>          | Atherosclerosis Risk in Communities Study                                                                                     |
| <b>BHF-FHS</b>       | British Heart Foundation Family Heart Study with UK Blood Service Controls                                                    |
| <b>BRHS</b>          | British Regional Heart Study                                                                                                  |
| <b>BWHHS</b>         | British Women's Heart and Health Study                                                                                        |
| <b>CAPS</b>          | Caerphilly Study                                                                                                              |
| <b>CCHS</b>          | Copenhagen City Heart Study                                                                                                   |
| <b>CGPS</b>          | Copenhagen General Population Study                                                                                           |
| <b>CHAOS</b>         | Cambridge Heart Antioxidant Study                                                                                             |
| <b>CHS</b>           | Cardiovascular Health Study                                                                                                   |
| <b>CIHDS</b>         | Copenhagen Ischaemic Heart Disease Study                                                                                      |
| <b>CRPHANS</b>       | CRP Gene Variants and Coronary Artery Disease in a Chinese Han Population                                                     |
| <b>CUDAS</b>         | Carotid Ultrasound Disease Assessment Study                                                                                   |
| <b>CUPID</b>         | Carotid Ultrasound in Patients with Ischaemic Heart Disease                                                                   |
| <b>4D</b>            | Die Deutsche Diabetes Dialyse (4D) Trial                                                                                      |
| <b>EAS</b>           | Edinburgh Artery Study                                                                                                        |
| <b>ELSA</b>          | English Longitudinal Aging Study                                                                                              |
| <b>EPICNL</b>        | European Prospective Investigation in Cancer and Nutrition, Netherlands Centre                                                |
| <b>EPICNOR</b>       | European Prospective Investigation in Cancer and Nutrition, Norfolk Centre                                                    |
| <b>FRAMOFF</b>       | Framingham Heart Study                                                                                                        |
| <b>GERMIFS</b>       | German Myocardial Infarction Family Study                                                                                     |
| <b>GISSI-P</b>       | Gruppo Italiano per lo Studio della Sopravvivenza nell'Infarto Miocardico                                                     |
| <b>HEALTHABC</b>     | Health Aging and Body Composition Study                                                                                       |
| <b>HIFMECH</b>       | The Hypercoagulability and Impaired Fibrinolytic Function Mechanisms Study                                                    |
| <b>HIMS</b>          | Health in Men Study                                                                                                           |
| <b>HPFS</b>          | Health Professionals Follow Up Study                                                                                          |
| <b>HVHS</b>          | Heart and Vascular Health Study                                                                                               |
| <b>INTERHEART</b>    | INTERHEART Study                                                                                                              |
| <b>ISIS</b>          | International Study of Infarct Survival                                                                                       |
| <b>LOLIPOP</b>       | London Life Sciences Prospective Population                                                                                   |
| <b>LURIC</b>         | The Ludwigshafen Risk and Cardiovascular Health Study                                                                         |
| <b>MALMO</b>         | Malmo Diet and Cancer Study                                                                                                   |
| <b>MONICAKORA</b>    | Monitoring of Trends and Determinants in Cardiovascular Disease / Cooperative Health Research in the Region of Augsburg Study |
| <b>NHS</b>           | Nurses Health Study                                                                                                           |
| <b>NPHSII</b>        | Northwick Park Heart Study II                                                                                                 |
| <b>NSC</b>           | Northern Swedish Cohort Study                                                                                                 |
| <b>PENNCATH</b>      | University of Pennsylvania Catheterization Study (PennCATH)                                                                   |
| <b>PROCARDIS</b>     | Precocious Coronary Artery Disease Study                                                                                      |
| <b>PROMIS</b>        | Pakistan Risk of Myocardial Infarction Study                                                                                  |
| <b>PROSPER</b>       | Prospective Study of Pravastatin in the Elderly at Risk                                                                       |
| <b>ROTTERDAM</b>     | Rotterdam Study                                                                                                               |
| <b>SHEEP</b>         | Stockholm Heart Epidemiology Program                                                                                          |
| <b>SPEED</b>         | Speedwell Study                                                                                                               |
| <b>UCP</b>           | Utrecht Cardiovascular Pharmacogenetics (UCP) Study                                                                           |
| <b>WHIOS</b>         | Women's Health Initiative Observational Study                                                                                 |
| <b>WHITEII</b>       | Whitehall II Study                                                                                                            |
| <b>WOSCOPS</b>       | West of Scotland Coronary Prevention Study                                                                                    |
