# Supplementary material
Source: PubMed Central journal article supplement (PMC4788088)
Supplement: wenf806596.ww4_default.pdf [file wenf806596.ww4_default.pdf]

#### **Appendix 4 Search strategy [posted as supplied by author]**

Any studies with information on any polymorphisms or haplotypes in or near the *CRP* locus were eligible for inclusion in the CCGC. Both retrospective case-control and prospective study designs were eligible as they were used for the analysis of *CRP* gene variants and CHD. Studies were identified through computer-assisted literature searches of publication databases, scanning of reference lists, hand-searching of relevant journals and by direct contact with authors and principal investigators of studies with relevant designs, identified primarily through a registry of large, well-validated genetic studies of CHD. Electronic searches were performed using MEDLINE, EMBASE, Science Citation Index and Google Scholar databases. Combinations of the following keywords were entered into search engines using Subject Headings (eg, MeSH, Emtree) where possible: C-reactive Protein, CRP, gene(s), genet\*, genot\*, single nucleotide polymorphism(s), SNP(s), variants, cardiovascular disease, CVD, coronary disease, myocardial infarction, myocardial ischaemia, myocardial ischemia, MI, CHD, and atherosclerosis. Titles and abstracts were scanned for relevant review articles (including previous meta-analyses of CRP - CHD associations) and for studies with the relevant endpoints. Reference lists were scanned and relevant journals (eg, *JAMA*, *NEJM*, *Circulation*, *BMJ*, *Lancet*, *Atherosclerosis*, etc) were hand-searched for further studies. Figure A in appendix 3 summarises the search strategy used to identify 51 potential studies, of which 47 agreed to participate.

To increase the power and reliability of the analyses, relevant large studies in the Emerging Risk Factors Collaboration with data on circulating CRP and CHD outcomes and stored blood samples, were identified and investigators invited to join the CCGC. The availability of funding for this collaboration<sup>1</sup> enabled these studies to measure the four principal SNPs, thereby contributing new, unpublished data to the consortium. Searches were updated periodically and investigators of any additional studies found were also invited to join the collaboration. As almost all identified studies shared data (many of which have not reported their findings), this collaboration maximizes comprehensiveness and minimizes publication biases. Similarly because of the inclusion of all available data on gene, disease and intermediate phenotypes from each study, this collaboration should substantially reduce any biases associated with the selective publication of only significant or interesting associations.<sup>2-4</sup> By July 2010, all 47 included studies had contributed data on 194,418 participants, including 46,557 incident and prevalent CHD cases. About one third of the cases (ie, 10,981 incident and 5241 prevalent cases) and two thirds of participants (124,931) derived from 27 prospective studies, including 2 case-cohort studies,<sup>5,6</sup> 10 case-control studies "nested" in larger cohorts (5 frequency matched<sup>7-10</sup> and 5 individually matched<sup>11-14</sup>) and 15 cohort studies<sup>7,15-26</sup> contributing 540 thousand person-years at risk. The remaining

30,335 prevalent cases derived from 20 retrospective case-control studies (comprising 69,487 participants).<sup>7;15;20;27-39</sup>

#### Reference List

- (1) Danesh J, Casas JP, Hingorani A, Smeeth L, Wensley F. British Heart Foundation Special Project Grant (no.SP/08/007): Collaborative pooled analysis of data on C-reactive protein gene variants and coronary disease. 2008.
- (2) Minelli C, Thompson JR, Tobin MD, Abrams KR. An integrated approach to the meta-analysis of genetic association studies using Mendelian randomization. *Am J Epidemiol* 2004; 160(5):445-452.
- (3) Palmer TM, Thompson JR, Tobin MD, Sheehan NA, Burton PR. Adjusting for bias and unmeasured confounding in Mendelian randomization studies with binary responses. *Int J Epidemiol* 2008; 37(5):1161-1168.
- (4) Palmer TM, Thompson JR, Tobin MD. Meta-analysis of Mendelian randomization studies incorporating all three genotypes. *Stat Med* 2008; 37(5):1161-1168.
- (5) Folsom AR, Ohira T, Yamagishi K, Cushman M. Low protein C and incidence of ischemic stroke and coronary heart disease: the Atherosclerosis Risk in Communities (ARIC) Study. *J Thromb Haemost* 2009; 7(11):1774-1778.
- (6) Koenig W, Khuseyinova N, Baumert J, Thorand B, Loewel H, Chambless L et al. Increased concentrations of C-reactive protein and IL-6 but not IL-18 are independently associated with incident coronary events in middle-aged men and women: results from the MONICA/KORA Augsburg case-cohort study, 1984-2002. *Arterioscler Thromb Vasc Biol* 2006; 26(12):2745-2751.
- (7) Lawlor DA, Harbord RM, Timpson NJ, Lowe GD, Rumley A, Gaunt TR et al. The association of C-reactive protein and CRP genotype with coronary heart disease: findings from five studies with 4,610 cases amongst 18,637 participants. *PLoS ONE* 2008; 3(8):e3011.
- (8) Wanner C, Krane V, Marz W, Olschewski M, Asmus HG, Kramer W et al. Randomized controlled trial on the efficacy and safety of atorvastatin in patients with type 2 diabetes on hemodialysis (4D study): demographic and baseline characteristics. *Kidney Blood Press Res* 2004; 27(4):259-266.
- (9) Berglund G, Elmstahl S, Janzon L, Larsson SA. The Malmo Diet and Cancer Study. Design and feasibility. *J Intern Med* 1993; 233(1):45-51.
- (10) Lee CC, You NC, Song Y, Hsu YH, Manson J, Nathan L et al. Relation of genetic variation in the gene coding for C-reactive protein with its plasma protein concentrations: findings from the Women's Health Initiative Observational Cohort. *Clin Chem* 2009; 55(2):351-360.
- (11) Pai JK, Mukamal KJ, Rexrode KM, Rimm EB. C-reactive protein (CRP) gene polymorphisms, CRP levels, and risk of incident coronary heart disease in two nested case-control studies. *PLoS One* 2008; 3(1):e1395.
- (12) Riboli E, Kaaks R. The EPIC Project: rationale and study design. European Prospective Investigation into Cancer and Nutrition. *Int J Epidemiol* 1997; 26 Suppl 1:S6-14.
- (13) Riboli E, Hunt KJ, Slimani N, Ferrari P, Norat T, Fahey M et al. European Prospective Investigation into Cancer and Nutrition (EPIC): study populations and data collection. *Public Health Nutr* 2002; 5(6B):1113-1124.

- (14) Wennberg P, Wensley F, Johansson L, Boman K, Di AE, Rumley A et al. Reduced risk of myocardial infarction related to active commuting: inflammatory and haemostatic effects are potential major mediating mechanisms. *Eur J Cardiovasc Prev Rehabil* 2010; 17(1):56-62.
- (15) Casas JP, Shah T, Cooper J, Hawe E, McMahon AD, Gaffney D et al. Insight into the nature of the CRP-coronary event association using Mendelian randomization. *Int J Epidemiol* 2006; 35(4):922-931.
- (16) Danesh J, Whincup P, Walker M, Lennon L, Thomson A, Appleby P et al. Low grade inflammation and coronary heart disease: prospective study and updated meta-analyses. *BMJ* 2000; 321(7255):199-204.
- (17) Kardys I, de Maat MP, Uitterlinden AG, Hofman A, Witteman JC. C-reactive protein gene haplotypes and risk of coronary heart disease: the Rotterdam Study. *Eur Heart J* 2006; 27(11):1331-1337.
- (18) Lange LA, Carlson CS, Hindorff LA, Lange EM, Walston J, Durda JP et al. Association of polymorphisms in the CRP gene with circulating C-reactive protein levels and cardiovascular events. *JAMA* 2006; 296(22):2703-2711.
- (19) Wilson PW, Nam BH, Pencina M, D'Agostino RB, Sr., Benjamin EJ, O'Donnell CJ. C-reactive protein and risk of cardiovascular disease in men and women from the Framingham Heart Study. *Arch Intern Med* 2005; 165(21):2473-2478.
- (20) Zacho J, Tybjaerg-Hansen A, Jensen JS, Grande P, Sillesen H, Nordestgaard BG. Genetically elevated C-reactive protein and ischemic vascular disease. *N Engl J Med* 2008; 359(18):1897-1908.
- (21) Tzoulaki I, Murray GD, Lee AJ, Rumley A, Lowe GD, Fowkes FG. Inflammatory, haemostatic, and rheological markers for incident peripheral arterial disease: Edinburgh Artery Study. *Eur Heart J* 2007; 28(3):354-362.
- (22) Marmot M, Banks J, Blundell R, Lessof C, Nazroo J. Health, wealth and lifestyles of the older population in England: The 2002 English longitudinal study of ageing. Marmot M, Banks J, Blundell R, Lessof C, Nazroo J, editors. 2003.
- (23) Cesari M, Penninx BW, Newman AB, Kritchevsky SB, Nicklas BJ, Sutton-Tyrrell K et al. Inflammatory markers and cardiovascular disease (The Health, Aging and Body Composition [Health ABC] Study). *Am J Cardiol* 2003; 92(5):522-528.
- (24) Cesari M, Penninx BW, Newman AB, Kritchevsky SB, Nicklas BJ, Sutton-Tyrrell K et al. Inflammatory markers and onset of cardiovascular events: results from the Health ABC study. *Circulation* 2003; 108(19):2317-2322.
- (25) Shepherd J, Blauw GJ, Murphy MB, Bollen EL, Buckley BM, Cobbe SM et al. Pravastatin in elderly individuals at risk of vascular disease (PROSPER): a randomised controlled trial. *Lancet* 2002; 360(9346):1623-1630.
- (26) Eiriksdottir G, Aspelund T, Bjarnadottir K, Olafsdottir E, Gudnason V, Launer LJ et al. Apolipoprotein E genotype and statins affect CRP levels through independent and different mechanisms: AGES-Reykjavik Study. *Atherosclerosis* 2006; 186(1):222-224.
- (27) Elliott P, Chambers JC, Zhang W, Clarke R, Hopewell JC, Peden JF et al. Genetic Loci associated with C-reactive protein levels and risk of coronary heart disease. *JAMA* 2009; 302(1):37-48.
- (28) Grammer TB, Marz W, Renner W, Bohm BO, Hoffmann MM. C-reactive protein genotypes associated with circulating C-reactive protein but not with angiographic coronary artery disease: the LURIC study. *Eur Heart J* 2009; 30(2):170-182.

- (29) Samani NJ, Erdmann J, Hall AS, Hengstenberg C, Mangino M, Mayer B et al. Genomewide association analysis of coronary artery disease. *N Engl J Med* 2007; 357(5):443-453.
- (30) Barzi F, Woodward M, Marfisi RM, Tavazzi L, Valagussa F, Marchioli R. Mediterranean diet and all-causes mortality after myocardial infarction: results from the GISSI-Prevenzione trial. *Eur J Clin Nutr* 2003; 57(4):604-611.
- (31) Bis JC, Heckbert SR, Smith NL, Reiner AP, Rice K, Lumley T et al. Variation in inflammation-related genes and risk of incident nonfatal myocardial infarction or ischemic stroke. *Atherosclerosis* 2008; 198(1):166-173.
- (32) Chapman CM, McQuillan BM, Beilby JP, Thompson PL, Hung J. Interleukin-18 levels are not associated with subclinical carotid atherosclerosis in a community population. The Perth Carotid Ultrasound Disease Assessment Study (CUDAS). *Atherosclerosis* 2006; 189(2):414-419.
- (33) Helgadóttir A, Thorleifsson G, Manolescu A, Gretarsdóttir S, Blondal T, Jonasdóttir A et al. A common variant on chromosome 9p21 affects the risk of myocardial infarction. *Science* 2007; 316(5830):1491-1493.
- (34) Reuterwall C, Hallqvist J, Ahlbom A, de FU, Diderichsen F, Hogstedt C et al. Higher relative, but lower absolute risks of myocardial infarction in women than in men: analysis of some major risk factors in the SHEEP study. The SHEEP Study Group. *J Intern Med* 1999; 246(2):161-174.
- (35) Saleheen D, Zaidi M, Rasheed A, Ahmad U, Hakeem A, Murtaza M et al. The Pakistan Risk of Myocardial Infarction Study: a resource for the study of genetic, lifestyle and other determinants of myocardial infarction in South Asia. *Eur J Epidemiol* 2009; 24(6):329-338.
- (36) Samani NJ, Burton P, Mangino M, Ball SG, Balmforth AJ, Barrett J et al. A genomewide linkage study of 1,933 families affected by premature coronary artery disease: The British Heart Foundation (BHF) Family Heart Study. *Am J Hum Genet* 2005; 77(6):1011-1020.
- (37) Stephens NG, Parsons A, Schofield PM, Kelly F, Cheeseman K, Mitchinson MJ. Randomised controlled trial of vitamin E in patients with coronary disease: Cambridge Heart Antioxidant Study (CHAOS). *Lancet* 1996; 347(9004):781-786.
- (38) Thompson SR, McCaskie PA, Beilby JP, Hung J, Jennens M, Chapman C et al. IL18 haplotypes are associated with serum IL-18 concentrations in a population-based study and a cohort of individuals with premature coronary heart disease. *Clin Chem* 2007; 53(12):2078-2085.
- (39) Wu, C, Sun, A, Gong, Y, Zou, Y, and Jun-bo, GE. C-Reactive Protein (CRP) Gene Variants and Coronary Artery Disease in a Chinese Han Population (CRP-Han). 2008, <http://clinicaltrials.gov/ct2/show/NCT00780221>. Last accessed March 2010.
